# Supplementary material for: Advancement in UV-Visible-IR Camouflage Textiles for Concealment of Defense Surveillance against Multidimensional Combat Backgrounds
Source: Preprints.org preprint supplement (doi:10.20944/preprints202310.1344.v1), 2023-10-23
Supplement: Supplementary file 1 [file supplementary]

# Advancement in UV-Visible-IR Camouflage Textiles for Concealment of Defense Surveillance against Multidimensional Combat Backgrounds

Md. Anowar Hossain

School of Fashion and Textiles, RMIT University, 25 Dawson Street, Brunswick, Melbourne, VIC 3056, Australia

([enr.anowar@yahoo.com](mailto:enr.anowar@yahoo.com))

Table SI.1. Summarized spectral coefficients of sun radiation, CB materials and camouflage materials for design of camouflage textiles in UV-Vis-IR illumination.

| a. Electron energy, E (eV) of sun radiation in UV-Vis-IR                           |      |      |      |      |       |       |       |      |      |       |      |      |      |
|------------------------------------------------------------------------------------|------|------|------|------|-------|-------|-------|------|------|-------|------|------|------|
| Wavelength (nm)                                                                    | 100  | 220  | 300  | 380  | 500   | 700   | 810   | 1000 | 2500 | 10000 |      |      |      |
| Electron energy, E (eV)                                                            | 12.4 | 5.6  | 4    | 3.26 | 2.47  | 1.77  | 1.53  | 1.24 | 0.5  | 0.12  |      |      |      |
| b. Irradiance coefficients of sun radiation in UV-Vis-IR                           |      |      |      |      |       |       |       |      |      |       |      |      |      |
| Wavelength (nm)                                                                    | 250  | 500  | 750  | 1000 | 1250  | 1500  | 1750  | 2000 | 2250 | 2500  |      |      |      |
| Irradiance (W/m <sup>2</sup> /nm)                                                  | 0.2  | 1.75 | 1.5  | 0.75 | 0.45  | 0.3   | 0.25  | 0.2  | 0.2  | 0.15  |      |      |      |
| c. Reflectance coefficients of snowland combat background in UV-Vis-IR             |      |      |      |      |       |       |       |      |      |       |      |      |      |
| Wavelength (nm)                                                                    | 400  | 500  | 600  | 700  | 800   | 900   | 1000  | 1100 | 1200 |       |      |      |      |
| Reflectance                                                                        | 0.64 | 0.66 | 0.63 | 0.62 | 0.61  | 0.58  | 0.42  | 0.45 | 0.4  |       |      |      |      |
| d. Reflectance coefficients of iceland combat background in UV-Vis-IR              |      |      |      |      |       |       |       |      |      |       |      |      |      |
| Wavelength (nm)                                                                    | 400  | 500  | 600  | 700  | 800   | 900   | 1000  | 1100 | 1200 |       |      |      |      |
| Reflectance                                                                        | 0.48 | 0.5  | 0.53 | 0.5  | 0.48  | 0.4   | 0.22  | 0.24 | 0.23 |       |      |      |      |
| e. Reflectance coefficients of water combat background in UV-Vis-IR                |      |      |      |      |       |       |       |      |      |       |      |      |      |
| Wavelength (nm)                                                                    | 400  | 500  | 600  | 700  | 800   | 900   | 1000  | 1100 | 1200 |       |      |      |      |
| Reflectance                                                                        | 0.04 | 0.03 | 0.03 | 0.03 | 0.02  | 0.01  | 0.01  | 0.01 | 0.01 |       |      |      |      |
| f. Radiance coefficients of sky combat background in UV-Vis-IR                     |      |      |      |      |       |       |       |      |      |       |      |      |      |
| Wavelength (nm)                                                                    | 300  | 500  | 700  | 900  | 1100  | 1300  | 1500  | 1700 | 1900 |       |      |      |      |
| Radiance (W/m <sup>2</sup> /nm/sr)                                                 | 0.15 | 0.4  | 0.25 | 0.15 | 0.05  | 0.05  | 0.03  | 0.05 | 0.01 |       |      |      |      |
| g. Reflectance coefficients of woodland combat background (grass) in UV-Vis-IR     |      |      |      |      |       |       |       |      |      |       |      |      |      |
| Wavelength (nm)                                                                    | 700  | 800  | 900  | 1000 | 1100  | 1200  | 1300  | 1400 | 1500 | 1600  |      |      |      |
| Reflectance coefficient                                                            | 0.3  | 0.35 | 0.4  | 0.45 | 0.5   | 0.48  | 0.45  | 0.3  | 0.33 | 0.35  |      |      |      |
| h. Reflectance coefficients of woodland combat background (tree bark) in UV-Vis-IR |      |      |      |      |       |       |       |      |      |       |      |      |      |
| Wavelength (nm)                                                                    | 500  | 1000 | 1500 | 2000 | 2500  |       |       |      |      |       |      |      |      |
| Reflectance coefficient                                                            | 0.1  | 0.4  | 0.38 | 0.25 | 0.15  |       |       |      |      |       |      |      |      |
| i. Reflectance coefficients of soil background in UV-Vis-IR                        |      |      |      |      |       |       |       |      |      |       |      |      |      |
| Wavelength (nm)                                                                    | 500  | 750  | 1000 | 1250 | 1500  | 1750  | 2000  | 2250 | 2500 |       |      |      |      |
| Reflectance coefficient                                                            | 0.1  | 0.3  | 0.35 | 0.4  | 0.41  | 0.42  | 0.43  | 0.38 | 0.37 |       |      |      |      |
| j. Reflectivity (%) of sand combat background                                      |      |      |      |      |       |       |       |      |      |       |      |      |      |
| Wavelength (nm)                                                                    | 2000 | 4000 | 6000 | 8000 | 10000 | 12000 | 14000 |      |      |       |      |      |      |
| Reflectivity (%)                                                                   | 73   | 70   | 5    | 2    | 8     | 3     | 5     |      |      |       |      |      |      |
| k. Reflectivity (%) of sand combat background                                      |      |      |      |      |       |       |       |      |      |       |      |      |      |
| Wavelength (nm)                                                                    | 400  | 600  | 800  | 1000 | 1200  |       |       |      |      |       |      |      |      |
| Reflectivity (%)                                                                   | 8    | 20   | 22   | 25   | 25    |       |       |      |      |       |      |      |      |
| l. Reflection (%) of woodland combat background                                    |      |      |      |      |       |       |       |      |      |       |      |      |      |
| Wavelength (nm)                                                                    | 300  | 500  | 700  | 900  | 1100  | 1300  | 1500  | 1700 | 1900 |       |      |      |      |
| Vegetation                                                                         | 4    | 6    | 6    | 50   | 52    | 48    | 20    | 28   | 10   |       |      |      |      |
| Deciduous tree                                                                     | 5    | 6    | 5    | 55   | 50    | 48    | 22    | 32   | 5    |       |      |      |      |
| m. Reflection (%) of urban combat background (brick & concrete)                    |      |      |      |      |       |       |       |      |      |       |      |      |      |
| Wavelength (nm)                                                                    | 300  | 500  | 700  | 900  | 1100  | 1300  | 1500  | 1700 | 1900 |       |      |      |      |
| Red brick                                                                          | 5    | 11   | 25   | 28   | 32    | 35    | 35    | 35   | 35   |       |      |      |      |
| Concrete                                                                           | 5    | 30   | 38   | 35   | 34    | 34    | 33    | 33   | 30   |       |      |      |      |
| n. Vis-IR photonic signal for simultaneous camouflage coloration                   |      |      |      |      |       |       |       |      |      |       |      |      |      |
| Pixel position                                                                     | 50   | 100  | 150  | 200  | 250   | 300   |       |      |      |       |      |      |      |
| Vis                                                                                | 0.68 | 0.55 | 0.15 | 0.95 | 0.35  | 0.18  |       |      |      |       |      |      |      |
| IR                                                                                 | 0.78 | 0.78 | 0.99 | 0.82 | 0.85  | 0.82  |       |      |      |       |      |      |      |
| Simultaneous Vis-IR                                                                | 1.46 | 1.33 | 1.14 | 1.77 | 1.2   | 1     |       |      |      |       |      |      |      |
| o. Reflectance (%) of high reflection materials in UV-Vis-IR                       |      |      |      |      |       |       |       |      |      |       |      |      |      |
| Wavelength (nm)                                                                    | 200  | 400  | 600  | 800  | 1000  | 10000 |       |      |      |       |      |      |      |
| Aluminium                                                                          | 90   | 91   | 90   | 90   | 92    | 98    |       |      |      |       |      |      |      |
| Rhodium                                                                            | 60   | 77   | 78   | 81   | 80    | 95    |       |      |      |       |      |      |      |
| Copper                                                                             | 40   | 35   | 78   | 95   | 98    | 98    |       |      |      |       |      |      |      |
| Titanium                                                                           | 30   | 45   | 55   | 56   | 57    | 88    |       |      |      |       |      |      |      |
| Silver                                                                             | 30   | 35   | 45   | 98   | 98    | 98    |       |      |      |       |      |      |      |
| Gold                                                                               | 30   | 5    | 98   | 98   | 98    | 98    |       |      |      |       |      |      |      |
| p. Absorption coefficients of synthetic dyes in UV-Vis-IR                          |      |      |      |      |       |       |       |      |      |       |      |      |      |
| Wavelength (nm)                                                                    | 350  | 400  | 450  | 500  | 550   | 600   | 650   | 700  | 750  | 800   | 850  | 900  | 950  |
| Chrysoidine                                                                        | 0.9  | 0.7  | 0.8  | 0.7  | 0.4   | 0.2   | 0.1   | 0.09 | 0.08 | 0.06  | 0.05 | 0.04 | 0.03 |
| Chrysophenine G                                                                    | 0.69 | 0.8  | 0.8  | 0.6  | 0.2   | 0.1   | 0.09  | 0.08 | 0.05 | 0.02  | 0.01 | 0.01 | 0.01 |
| Orange 2                                                                           | 0.9  | 0.7  | 0.7  | 0.8  | 0.5   | 0.12  | 0.1   | 0.09 | 0.05 | 0.04  | 0.02 | 0.02 | 0.02 |
| Lithol fast scarlet-RNP                                                            | 0.5  | 0.52 | 0.51 | 0.61 | 0.51  | 0.1   | 0.08  | 0.05 | 0.04 | 0.04  | 0.04 | 0.04 | 0.04 |
| Flavophosphine                                                                     | 0.9  | 0.68 | 0.71 | 0.6  | 0.29  | 0.18  | 0.12  | 0.1  | 0.09 | 0.08  | 0.05 | 0.04 | 0.04 |
| q. Reflection (%) of ZnO pigment in Vis-IR                                         |      |      |      |      |       |       |       |      |      |       |      |      |      |
| Wavelength (nm)                                                                    | 400  | 500  | 600  | 700  | 800   | 900   | 1000  | 1100 | 1200 | 1300  | 1400 | 1500 | 1600 |
| Reflection (%)                                                                     | 80   | 85   | 85   | 85   | 85    | 85    | 85    | 85   | 84   | 84    | 80   | 83   | 83   |
| Wavelength (nm)                                                                    |      |      | 1700 | 1800 | 1900  | 2000  | 2100  | 2200 |      |       |      |      |      |
| Reflection (%)                                                                     |      |      | 83   | 83   | 83    | 85    | 85    | 85   |      |       |      |      |      |
